# Supplementary material
Source: PubMed Central journal article supplement (PMC2757623)
Supplement: 10126_2007_9065_MOESM1_ESM.pdf [file 10126_2007_9065_MOESM1_ESM.pdf]

**Supplementary material, to be published online**

Table S1. *Zostera marina* TUGs differentially regulated among library 'D' (winter situation) and library 'C' (average summer condition). The statistical test for each gene was performed by binomial approximation as suggested in Susko & Roger (2004). *P*-values refer to comparison of individual gene frequency. The gene description starts with a SWISSPROT entry number if not indicated otherwise (GB = Genbank).

| TUG id                        | P-value  | library D | library C | Data base entry, gene description - species of best hit                          |
|-------------------------------|----------|-----------|-----------|----------------------------------------------------------------------------------|
| Upregulation winter -> summer |          |           |           |                                                                                  |
| Contig62                      | 5.55e-07 | 0         | 14        | GB AT1G29930.1, light-harvesting complex - <i>Arabidopsis thaliana</i>           |
| Contig68                      | 1.84e-03 | 12        | 20        | Q41914, cysteine-rich protein - <i>Arabidopsis thaliana</i>                      |
| Contig61                      | 2.25e-03 | 1         | 8         | NoHit                                                                            |
| Contig849                     | 3.10e-03 | 0         | 6         | NoHit                                                                            |
| Merge29                       | 3.24e-03 | 2         | 9         | P27521, chlorophyll a/b binding protein 4 - <i>Arabidopsis thaliana</i>          |
| Contig107                     | 9.11e-03 | 0         | 5         | O04006, photosystem I reaction center subunit VI - <i>Brassica rapa</i>          |
| Contig188                     | 9.11e-03 | 0         | 5         | Q9SA56, photosystem I reaction center subunit II-2 - <i>Arabidopsis thaliana</i> |
| Contig71                      | 9.11e-03 | 0         | 5         | GR Q8LHX8, unknown protein - <i>Oryza sativa</i>                                 |
| Contig114                     | 9.11e-03 | 0         | 5         | Q9XF88, chlorophyll a/b binding protein CP29 - <i>Arabidopsis thaliana</i>       |

TBH Reusch et al.

*Zostera marina* EST library comparison

|           |          |   |    |                                                                                  |
|-----------|----------|---|----|----------------------------------------------------------------------------------|
| Contig101 | 9.11e-03 | 0 | 5  | GR Q9LD82, putative heme binding protein 2 - <i>Oryza sativa</i>                 |
| Merge71   | 9.11e-03 | 0 | 5  | P12360, chlorophyll a/b binding protein 6a - <i>Solanum lycopersicum</i>         |
| Contig109 | 2.68e-02 | 0 | 4  | Q9SFF9, germin like protein - <i>Arabidopsis thaliana</i>                        |
| Contig200 | 2.68e-02 | 0 | 4  | P50156, probable aquaporin TIP1.1 - <i>Oryza sativa</i>                          |
| Contig228 | 2.68e-02 | 0 | 4  | P13192, photosystem I reaction center subunit III - <i>Hordeum vulgare</i>       |
| Contig94  | 2.68e-02 | 0 | 4  | P42767, Aquaporin PIP-type - <i>Atriplex canescens</i>                           |
| Contig172 | 2.68e-02 | 0 | 4  | Q9SUI5, Photosystem I reaction center subunit psaK - <i>Arabidopsis thaliana</i> |
| Contig25  | 2.68e-02 | 0 | 4  | P69326 - ubiquitin - <i>Triticum aestivum</i>                                    |
| Contig133 | 3.71e-02 | 6 | 10 | P14009, 14kDa proline-rich protein - <i>Daucus carota</i>                        |
| Contig826 | 3.92e-02 | 1 | 5  | NoHit                                                                            |
| merge188  | 3.92e-02 | 1 | 11 | P27495, chlorophyll a/b binding protein 40 - <i>Nicotiana tobaccum</i>           |

Downregulation winter -> summer

|           |          |     |    |                                                                                 |
|-----------|----------|-----|----|---------------------------------------------------------------------------------|
| Contig479 | 1.03e-16 | 290 | 47 | Q41914, low-molecular weight cystein rich protein - <i>Arabidopsis thaliana</i> |
| Contig926 | 7.42e-04 | 19  | 0  | Q7YJV4, chloroplast 30S ribosomal protein - <i>Calycanthus fertilis</i>         |
| Contig28  | 8.99e-03 | 13  | 0  | Q9MTP2, hypothetical protein in trnF-trnL intron - <i>Oenothera hookeri</i>     |
| Contig483 | 1.36e-02 | 12  | 0  | Q2VEI9, ATP synthase C chain - <i>Solanum tuberosum</i>                         |

TBH Reusch et al.

*Zostera marina* EST library comparison

|           |          |    |   |                                                                        |
|-----------|----------|----|---|------------------------------------------------------------------------|
| Contig326 | 3.13e-02 | 10 | 0 | Q39194, photosystem II reaction center W - <i>Arabidopsis thaliana</i> |
| Contig301 | 4.74e-02 | 9  | 0 | NoHit                                                                  |
| Contig296 | 4.74e-02 | 9  | 0 | NoHit                                                                  |
